# Supplementary material for: Electrically Reconfigurable Optical PUFs Based on MoS2 Photoluminescence Modulation
Source: Research Square preprint supplement (doi:10.21203/rs.3.rs-7074604/v1), 2025-07-15
Supplement: Supplementary file 1 [file 2b7f812ec98a3a3184eb5451.docx]

**Supplementary Information**

**Electrically Reconfigurable Optical PUFs Based on MoS2 Photoluminescence Modulation**

**Xianjie Lin1,3,****4#, Xin Li1,3#, XiaoFang Wang1,2, Jin Chen1,3, Feilong Yu1,3, Juntong Liu1,3,4, Yuxin Song1,3, Jiaji Yang1,3,5, Junzhe Gu1,3, Xiaoshuang Chen1,3,4,6*, Wei Lu1,3,5,6*, Guanhai Li1,3,6,7***

1State Key Laboratory of Infrared Physics, Shanghai Institute of Technical Physics, Chinese Academy of Sciences, 500 Yu-Tian Road, Shanghai, 200083, China

2School of Arts and Sciences, Shanghai Dianji University, Shanghai 201306, China

3University of Chinese Academy of Sciences, No. 19A Yuquan Road, Beijing 100049, China

4Hefei National Laboratory, University of Science and Technology of China, Hefei 230088, China

5School of Physical Science and Technology, ShanghaiTech University, Shanghai 201210, China

6Hangzhou Institute for Advanced Study, University of Chinese Academy of Sciences, No.1 Sub-Lane Xiangshan, Hangzhou, 310024, China

7Shanghai Research Center for Quantum Sciences, 99 Xiupu Road, Shanghai, 201315, China

*ghli0120@mail.sitp.ac.cn; xschen@mail.sitp.ac.cn; luwei@mail.sitp.ac.cn

**Table of contents**

**Fig. S1. Statistical distribution of inter-Hamming distances for PL intensity values (50 regions) with Gaussian fitting.**

**Fig. S2. Energy band evolution of bilayer MoS2 under electric displacement field.**

**Fig. S3. Energy band evolution of quadrilayer MoS2 under electric displacement field.**

**Fig. S4. Energy band evolution of hexalayer MoS2 under electric displacement field.**

**Fig. S5. Secure key generation and reconfigurable PUFs analysis based on PL wavelength statistics.**

**Supplementary Note 1. Calculation of grayscale value.**

**Supplementary Note 2. Calculation of various performances of electrically reconfigurable optical PUFs.**

**Supplementary Note 3. First-principles calculations utilizing VASP.**


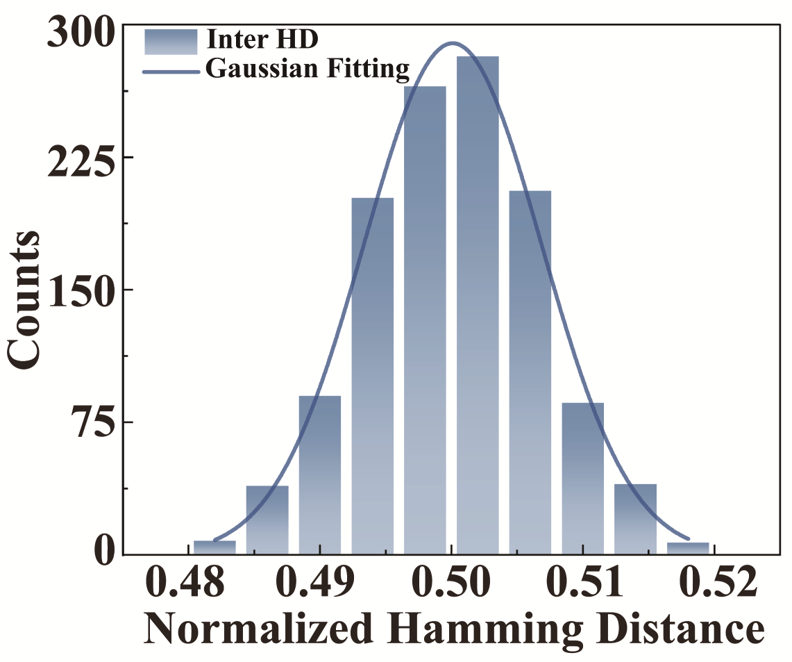


**Fig. S1. Statistical distribution of inter-Hamming distances for PL intensity values (50 regions) with Gaussian fitting.**


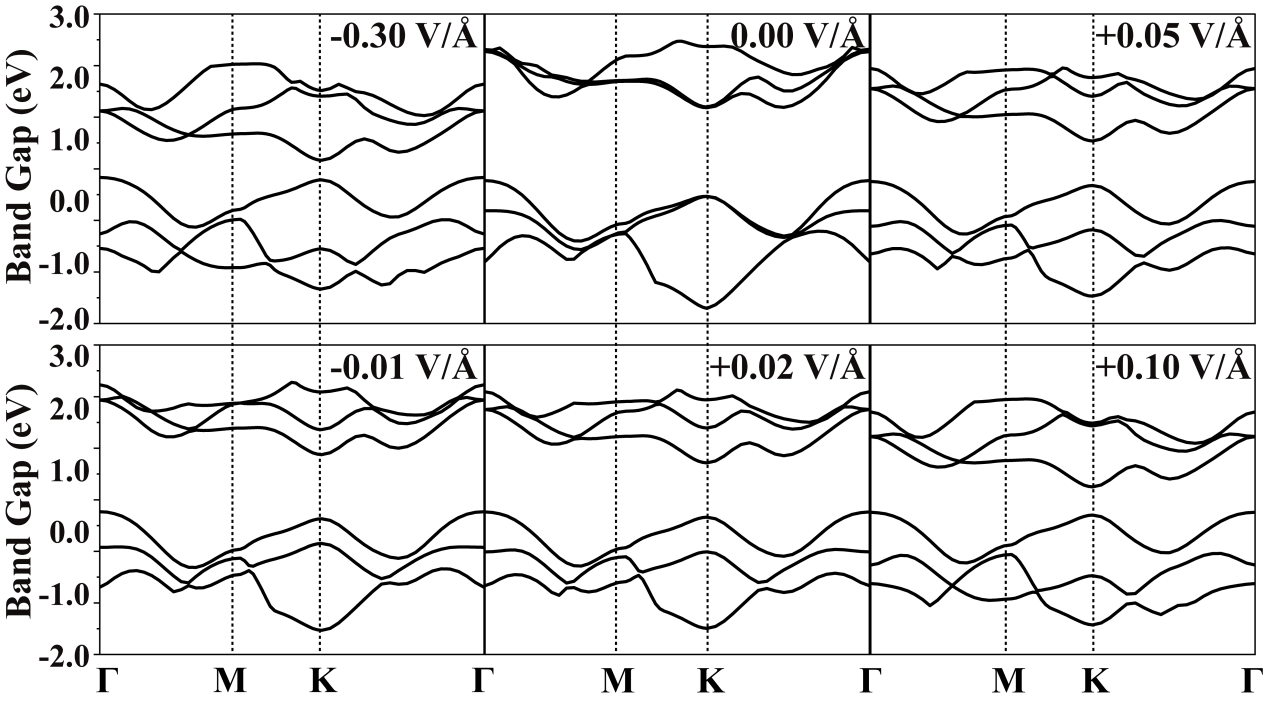


**Fig. S2. Energy band evolution of bilayer MoS2 under electric displacement field.**

**
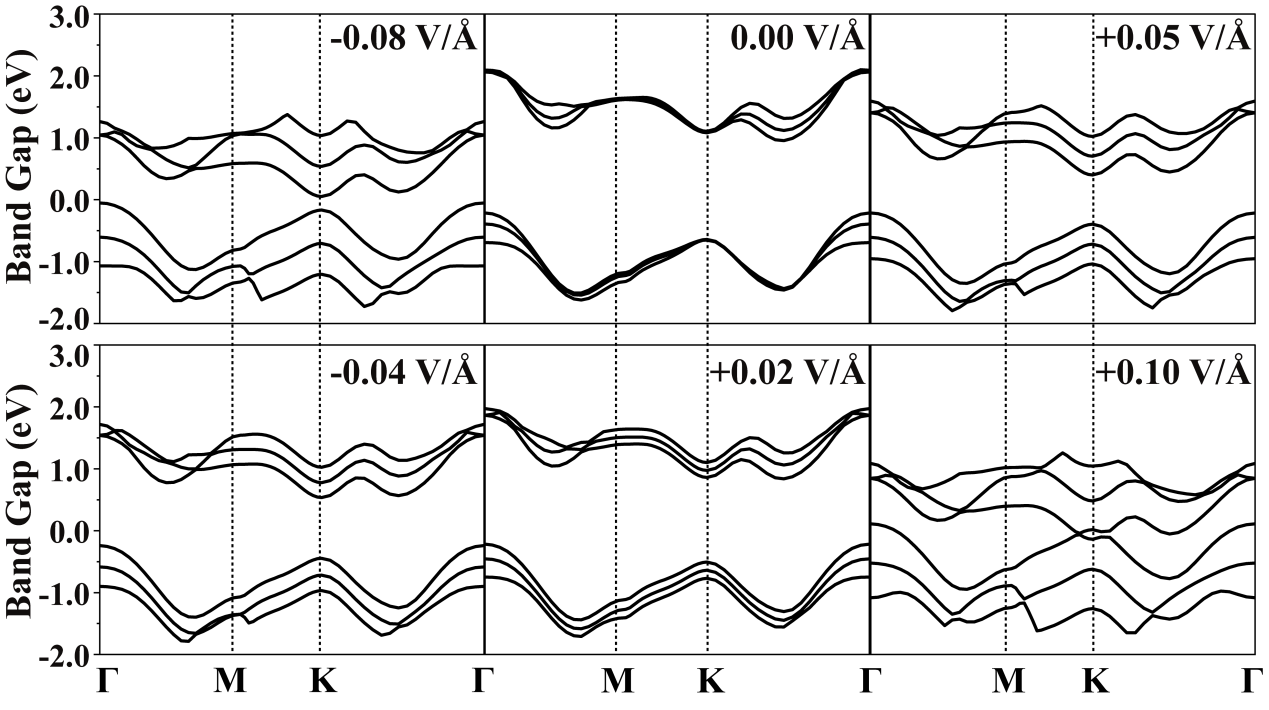
**

**Fig. S3. Energy band evolution of quadrilayer MoS2 under electric displacement field.**

**
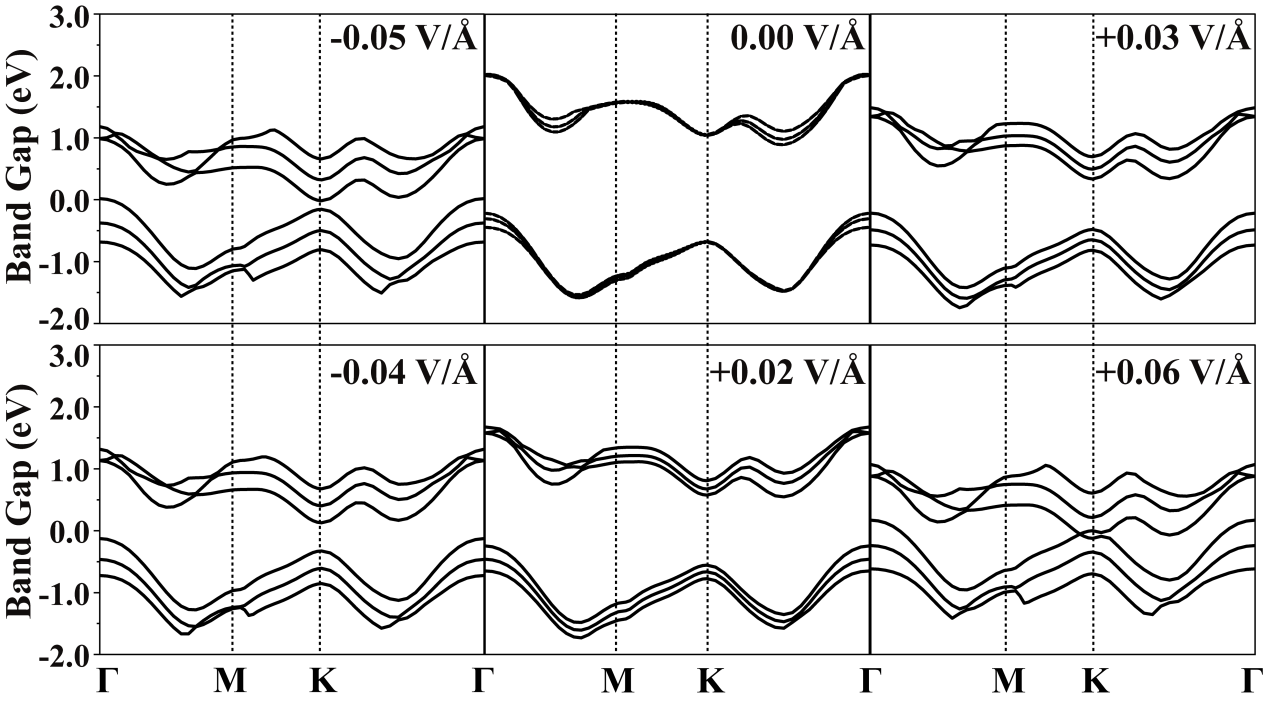
**

**Fig. S4. Energy band evolution of hexalayer MoS2 under electric displacement field.**


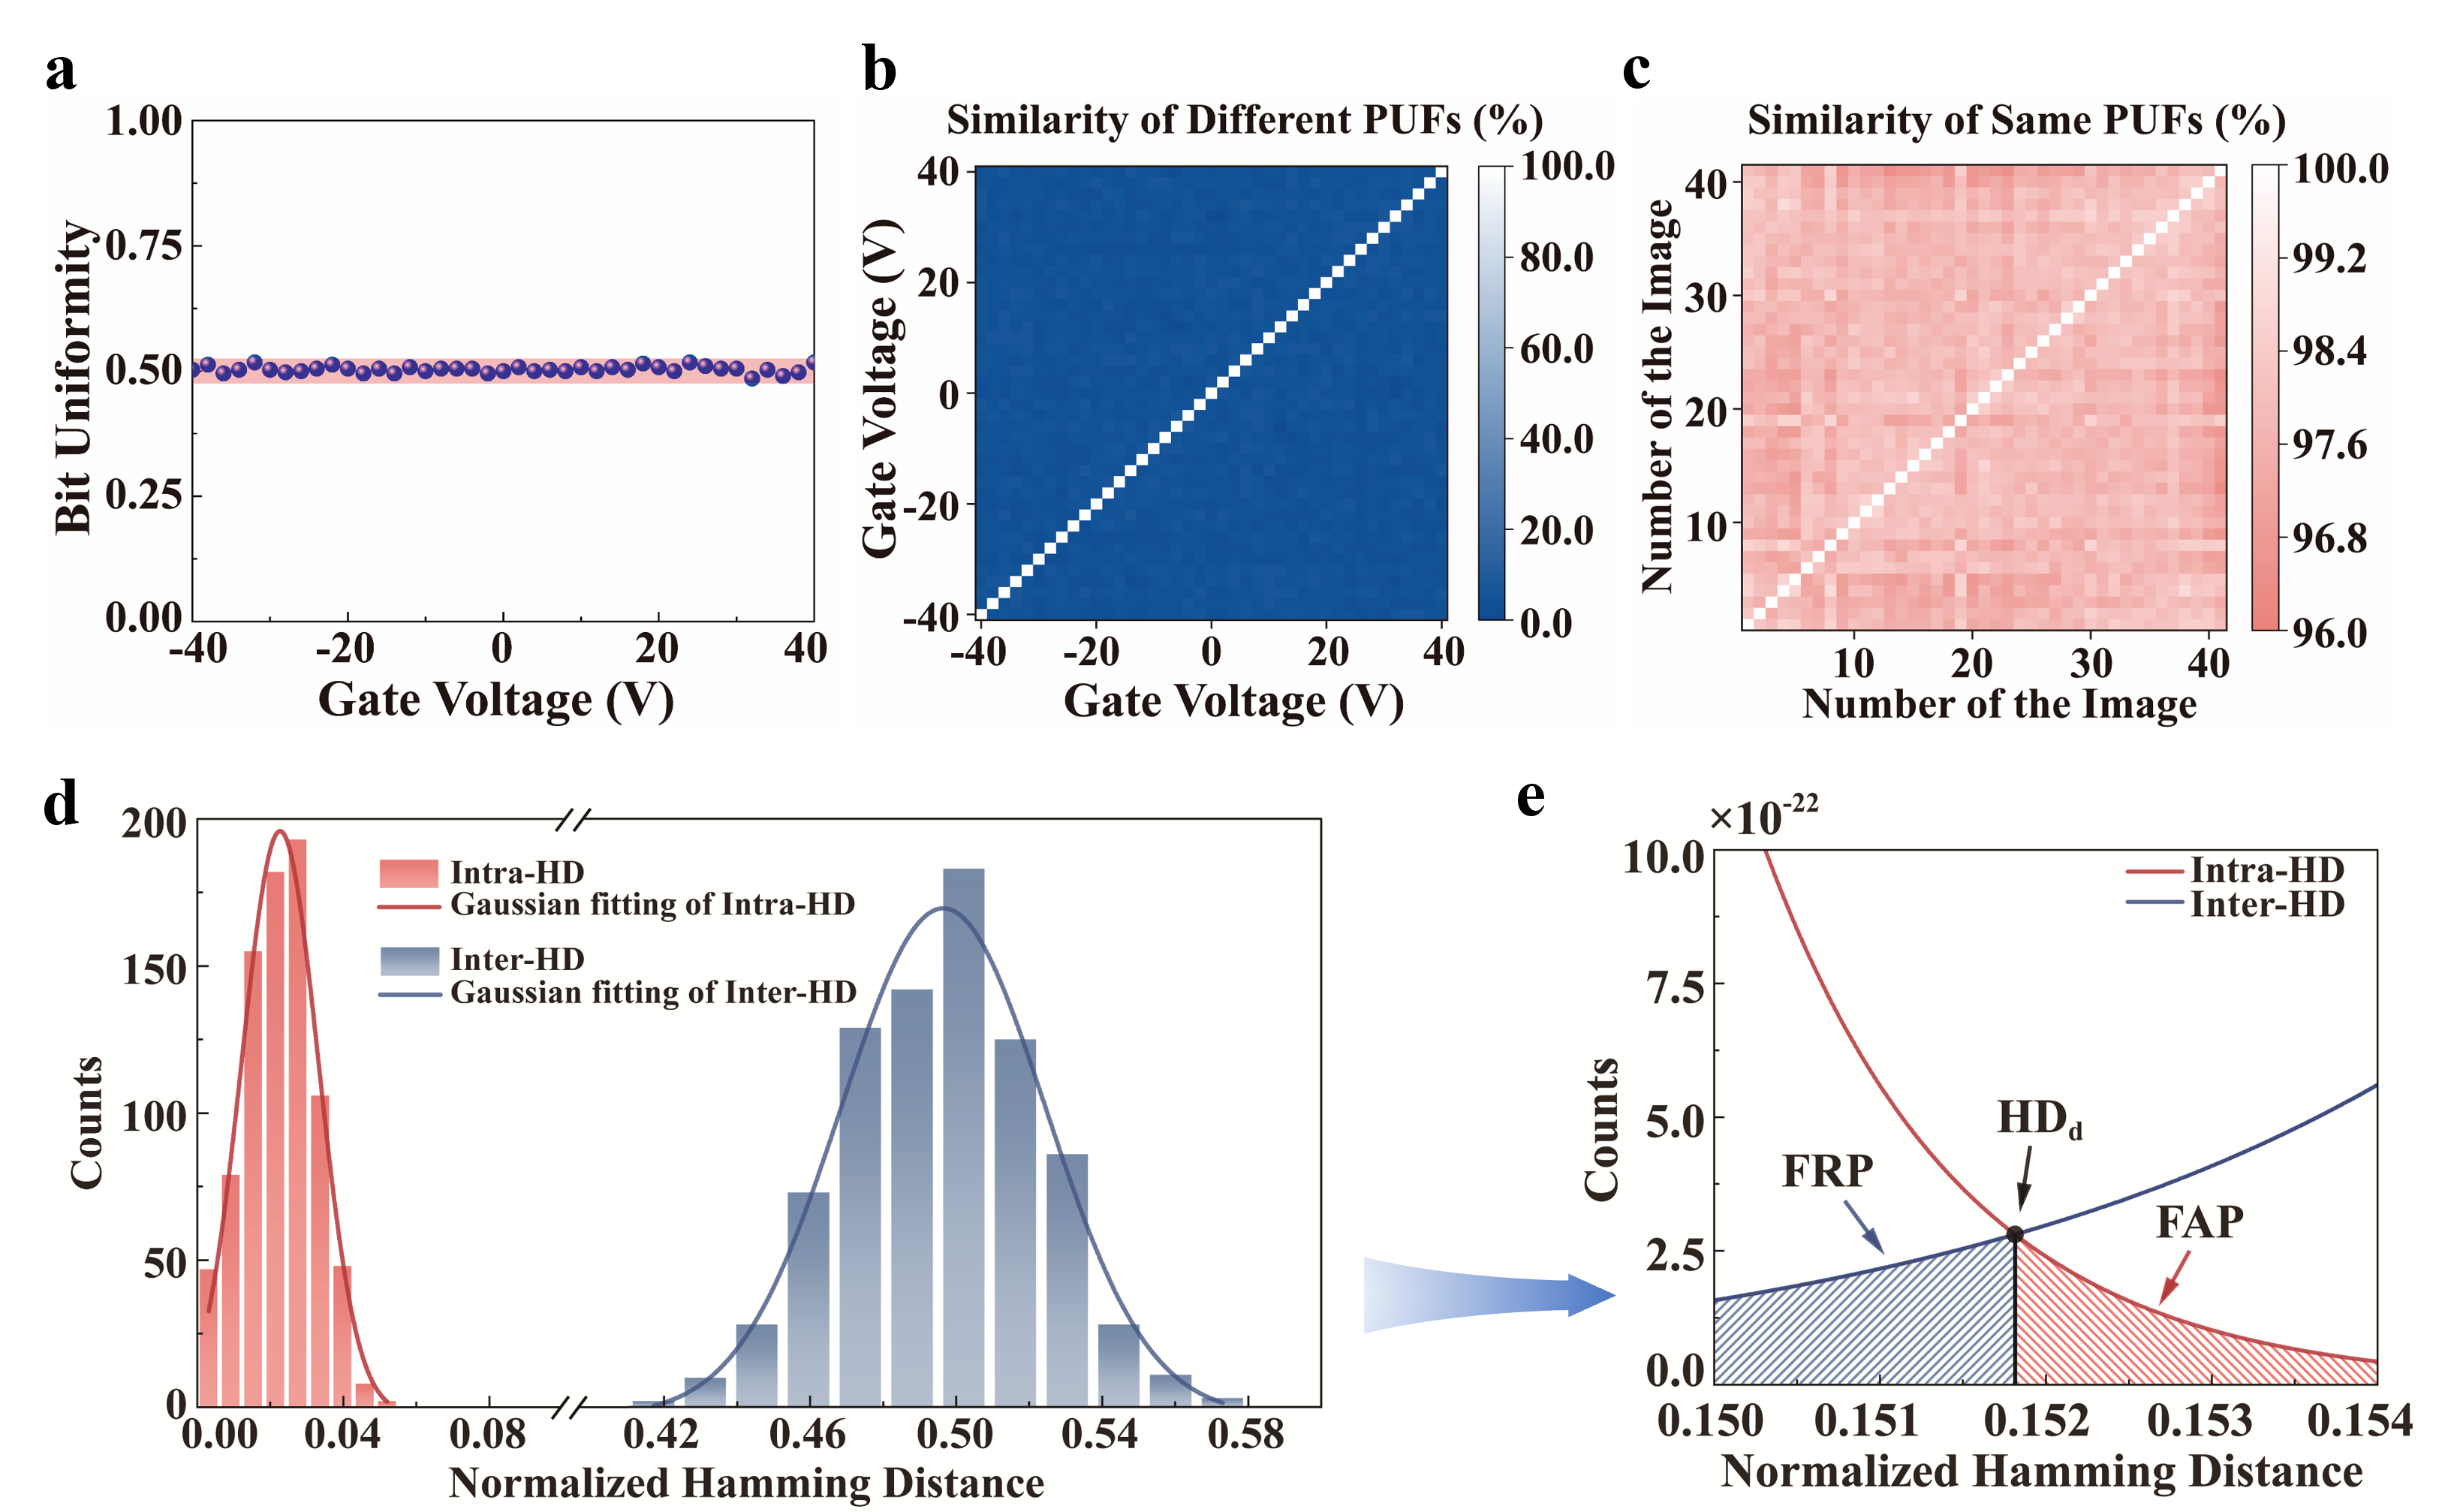


**Fig. S5. Secure key generation and reconfigurable PUFs analysis based on PL wavelength statistics. (a) Probability of binary "1" occurrence in keys extracted from 41 gate voltage modulations (Vg: −40 V to +40 V). (b) Similarity heatmap of PL wavelength-based PUFs across 41 gate voltage modulations. (c) Similarity heatmap of PL wavelength-based PUFs under repeated measurements at a fixed gate voltage (+40 V). (d) Normalized Hamming distance distributions for Intra-HD (same Vg) and Inter-HD (different Vg), fitted to Gaussian profiles. (e) Zoomed-in view of the Intra-HD and Inter-HD curves near their intersection. The x-coordinate of the intersection defines the decision threshold (HDd). The red-shaded area represents the false acceptance probability (FAP), while the blue-shaded area corresponds to the false rejection probability (FRP).**

**Supplementary Note 1. Calculation of grayscale value.**

The size of a PUFs is 50*50 μm2, and the size of each unit is 2.5*2.5 μm2. The scale of the optical microscope is 10 μm. According to the scale and the number of pixels, each unit contains 43*43 pixels. Convert the RGB value of each pixel in a cell into a grayscale value, and then conduct the mean processing to obtain the grayscale value of this cell, as shown in equation (1)

(1)

Where *R(i, j)*, *G(i, j)* and *B(i, j)* respectively represent the red, green and blue values in the RGB values of each pixel.

**Supplementary Note 2. Calculation of various performances of electrically reconfigurable optical PUFs.**

Use equation (2) to represent bit uniformity

Bit Uniformity **=**  (2)

where *bi* represents the *i*th response of a *n* bit binary key, which can only be 0 or 1.

Use equation (3) to calculate the Intra Hamming Distance

Intra Hamming Distance = (3)

where *HD(Ki, Ki,t)* represents the Hamming distance between the *i*th PUFs itself and its *t*-th response, *m* and n refers to the number of PUFs repetitions and key size respectively.

Use equation (4) to calculate the Inter Hamming Distance

Inter Hamming Distance = (4)

where *HD (Ki, Kj)* is the Hamming distance between the *i*th PUFs and the *j*th PUFs, *N* and *n* refer to the number of PUFs and key size respectively.

**Supplementary Note 3. First-principles calculations utilizing VASP.**

In this work, All structures have hexagonal symmetry and belong to the P63/mmc space group. The monolayers and polylayers were cut out from the fully optimized bulk structures as (001) surfaces. Each slab is separated from the other by a vacuum region of 18 Å along (001) direction, so that the surfaces do not couple with each other. Calculations of the total energies, forces and optimizations of the geometry have been carried out using a plane-wave basis set with the projector augmented plane-wave (PAW) method1 as implemented in the Vienna ab initio simulation package (VASP)2. The exchange interaction effects are considered using the Perdew-Burke-Ernzerhof (PBE) in the generalized gradient approximation (GGA)3. The k-point sampling in the Brillouin zone was implemented by the Monkhorst-Pack scheme with the grid of 21×21×1. Band structures were calculated along the high symmetry points using the path Γ-M-K-Γ. The ionic relaxation to the equilibrium structure is determined using a conjugate-gradient algorithm, and the convergence in energy and force are 1.0×10-4 eV and 1.0×10-2 eV/Å, respectively. All the cases concerned are converged well.

**Supplementary References**

1. Blöchl P. E. Projector augmented-wave method. *Physical Review B.* **50**, 17953 (1994).
2. Kresse, G. G., Furthmüller J. J. Efficient iterative schemes for ab initio total-energy calculations using a plane-wave basis set. *Physical Review B.* **54**, 11169 (1996).
3. Kresse, G., Joubert, D. From ultrasoft pseudopotentials to the projector augmented-wave method. *Physical Review B.* **59**, 1758-1775 (1999).
